# Supplementary material for: Synthesis and activity of a novel diether phosphonoglycerol in phospholipase-resistant synthetic lipid:peptide lung surfactants
Source: Royal Society of Chemistry journal article supplement (doi:10.1039/c1md00206f), 2011-01-01

# SUPPORTING INFORMATION

## Synthesis and Activity of A Novel Diether Phosphonoglycerol in Phospholipase-Resistant Synthetic Lipid:Peptide Lung Surfactants

Adrian L. Schwan<sup>a</sup>, Suneel P. Singh<sup>a</sup>, Jason A. Davy<sup>a</sup>, Alan J. Waring<sup>b,c</sup>, Larry M. Gordon<sup>b</sup>, Frans J. Walther<sup>b</sup>, Zhengdong Wang<sup>d</sup>, and Robert H. Notter<sup>d</sup>

<sup>a</sup> Department of Chemistry, University of Guelph, Guelph, ON, Canada, N1G 2W1

<sup>b</sup> Department of Pediatrics, LA Biomed Research Institute/Harbor-UCLA, Torrance, CA 90502

<sup>c</sup> Department of Physiology and Biophysics, School of Medicine, UC Irvine 92697

<sup>d</sup> Department of Pediatrics, University of Rochester, Rochester, NY 14642

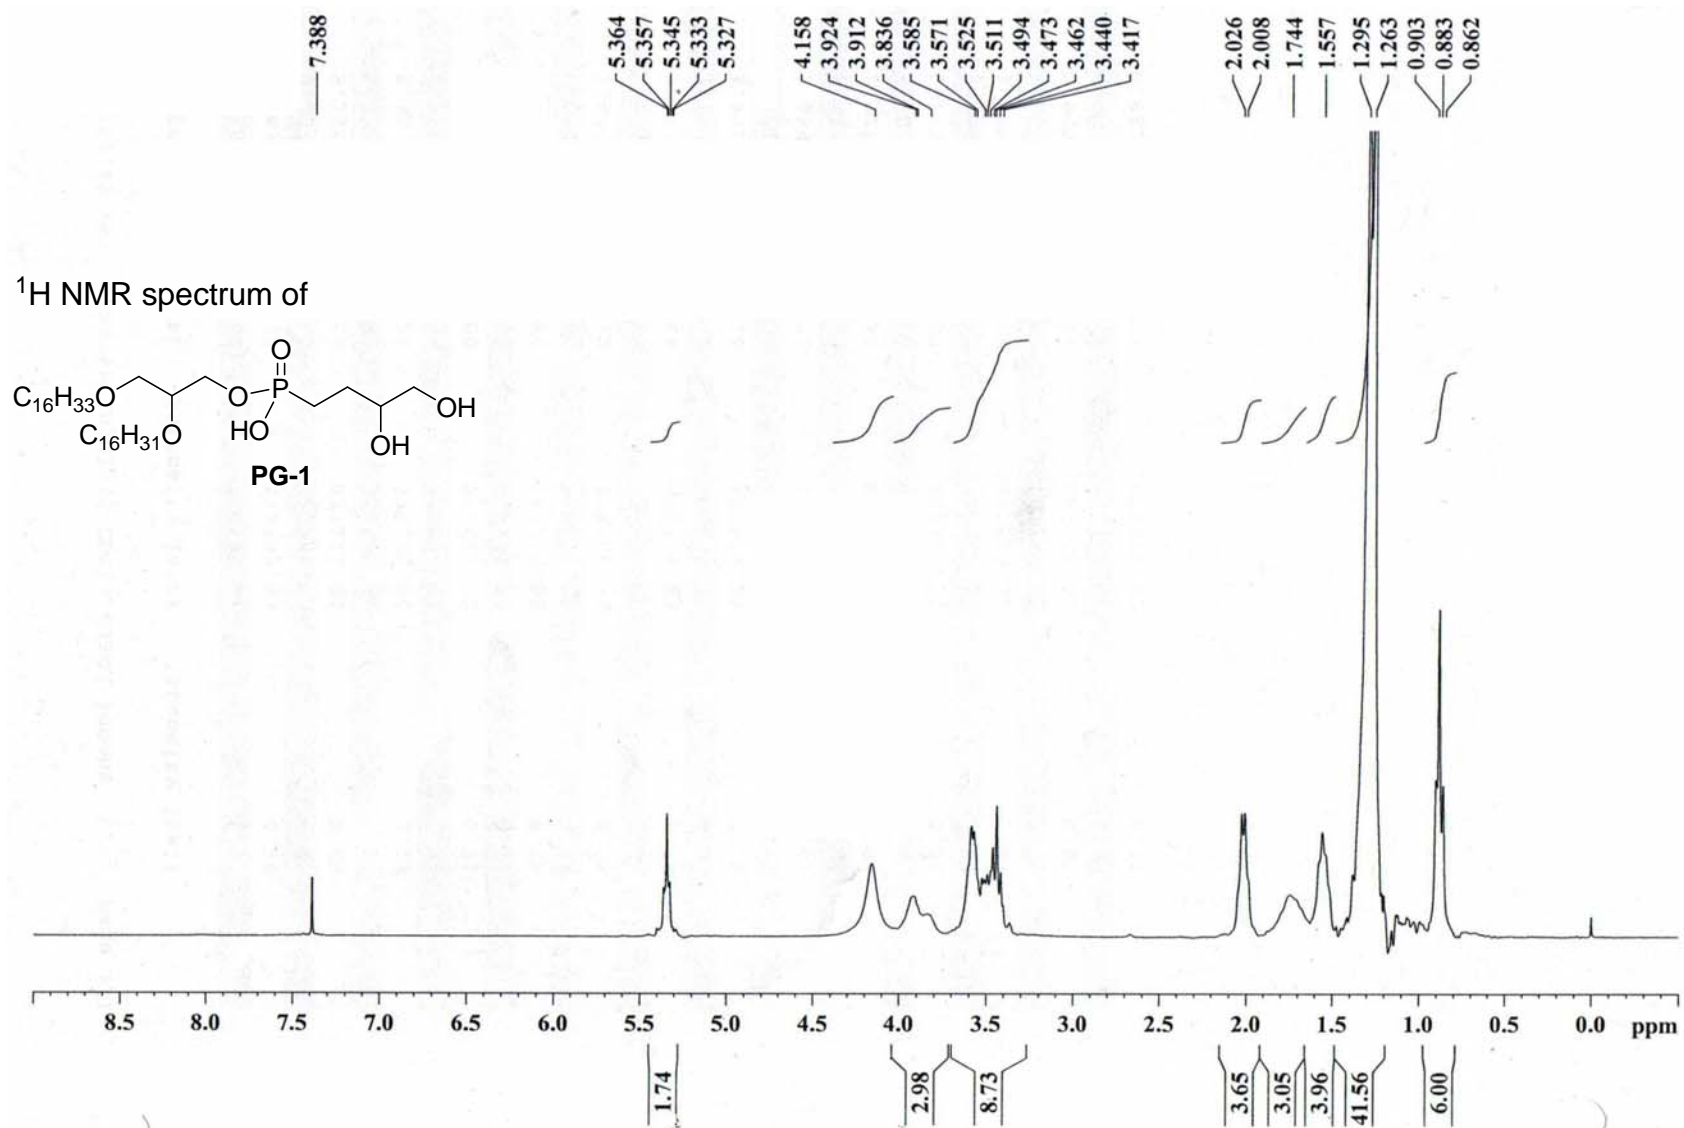

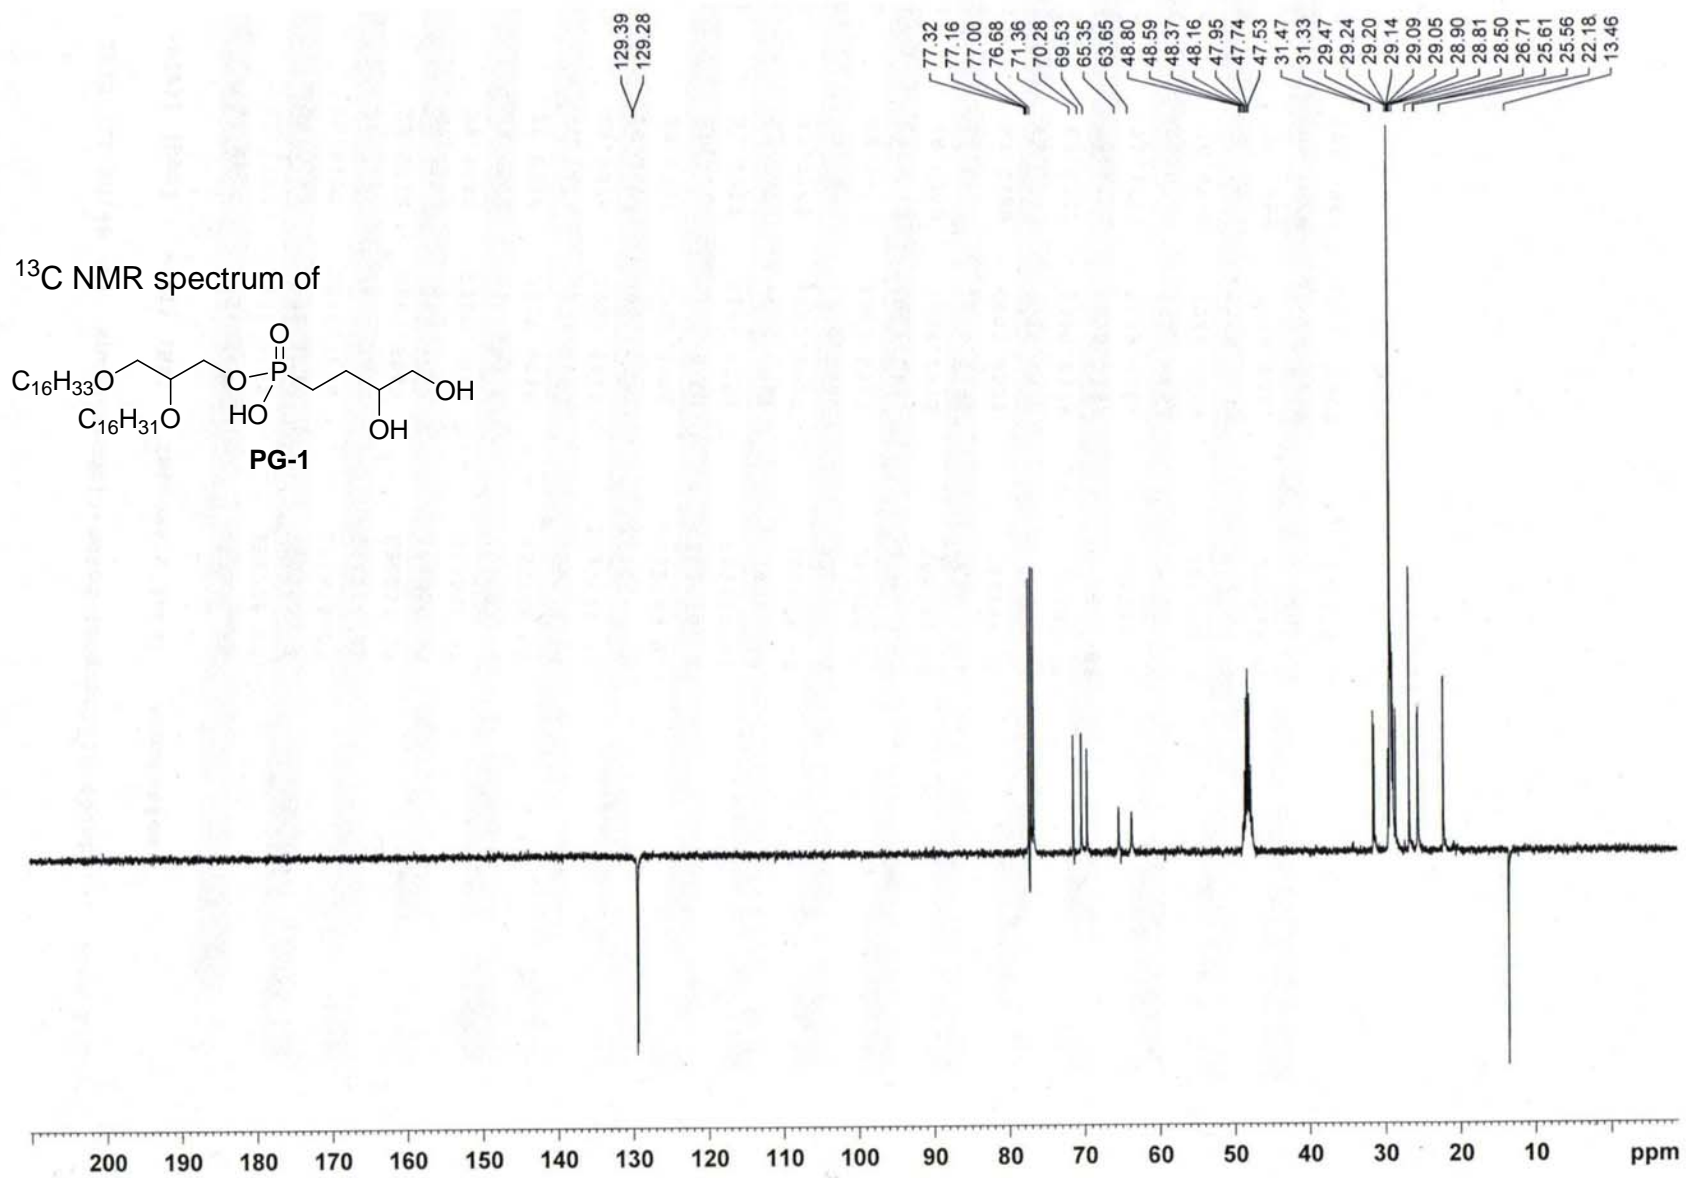

Supplement: c1md00206f.pdf [file c1md00206f.pdf]
